# Supplementary material for: Understanding the impact loading characteristics of a badminton lunge among badminton players
Source: PLoS One. 2018 Oct 12;13(10):e0205800. doi: 10.1371/journal.pone.0205800 (PMC6185854; doi:10.1371/journal.pone.0205800)
Supplement: S1 File — (XLSX) [file pone.0205800.s001.xlsx]

## Sheet: Subject information
			Group#
			Elite_male	1	Int_male	2	Elite_female	3	Int_female	4
				Height			Weight			Years			Career
				unit	m		unit	kg		unit	y		unit	y
			Group#
Elite_male	S_1	1	1	1.75	1.75		68	68		21	21		10	10
	S_2	1	1	1.86	1.86		65	65		20	20		9	9
	S_3	1	1	1.73	1.73		65	65		20	20		8	8
	S_4	1	1	1.81	1.81		70	70		20	20		7	7
	S_5	1	1	1.76	1.76		69	69		21	21		8	8
	S_6	1	1	1.76	1.76		75	75		22	22		9	9
	S_7	1	1	1.86	1.86		80	80		21	21		11	11
	S_8	1	1	1.85	1.85		79	79		20	20		7	7
	S_9	1	1	1.78	1.78		77	77		20	20		6	6
	S_10	1	1	1.68	1.68		63	63		21	21		8	8
	S_11	1	1	1.78	1.78		69	69		20	20		9	9
Int_male	S_1	1	2	1.79	1.79		65	65		21	21		3	3
	S_2	1	2	1.73	1.73		72	72		20	20		2	2
	S_3	1	2	1.79	1.79		71	71		20	20		4	4
	S_4	1	2	1.8	1.8		64	64		20	20		2	2
	S_5	1	2	1.8	1.8		63	63		21	21		5	5
	S_6	1	2	1.8	1.8		68	68		22	22		3	3
	S_7	1	2	1.59	1.59		63	63		20	20		4	4
	S_8	1	2	1.77	1.77		70	70		21	21		3	3
	S_9	1	2	1.7	1.7		64	64		25	25		2	2
	S_10	1	2	1.76	1.76		68	68		24	24		3	3
	S_11	1	2	1.78	1.78		64	64		21	21		4	4
	S_12	1	2	1.8	1.8		78	78		20	20		5	5
	S_13	1	2	1.76	1.76		58	58		21	21		2	2
	S_14	1	2	1.73	1.73		60	60		22	22		3	3
	S_15	1	2	1.82	1.82		76	76		23	23		3	3
Elite_female	S_1	2	1	1.7			70			23			13
	S_2	2	1	1.65			59			22			9
	S_3	2	1	1.6			55			21			11
	S_4	2	1	1.68			65			20			9
	S_5	2	1	1.64			56			20			9
	S_6	2	1	1.85			68			25			11
	S_7	2	1	1.67			59			20			11
	S_8	2	1	1.65			61			21			11
	S_9	2	1	1.69			66			21			10
	S_10	2	1	1.64			52			28			8
	S_11	2	1	1.6			58			20			9
Int_female	S_1	2	2	1.7			66			21			2
	S_2	2	2	1.67			56			22			3
	S_3	2	2	1.62			53			21			2
	S_4	2	2	1.7			62			19			1
	S_5	2	2	1.63			56			21			2
	S_6	2	2	1.69			60			21			2
	S_7	2	2	1.65			65			24			2
	S_8	2	2	1.65			65			22			3
	S_9	2	2	1.62			62			25			3
	S_10	2	2	1.64			51			22			1
	S_11	2	2	1.59			54			20			2
	S_12	2	2	1.64			60			21			2
	S_13	2	2	1.62			49			23			3
	S_14	2	2	1.66			62			21			2
	S_15	2	2	1.54			48			21			2
				Height			Weight			Years			Career
1	Mean			1.78364	1.78364		70.9091	70.9091		20.5455	20.5455		8.36364	8.36364
	SD			0.0571442	0.0571442		5.92376	5.92376		0.687552	0.687552		1.43337	1.43337
2	Mean			1.76133	1.76133		66.9333	66.9333		21.4	21.4		3.2	3.2
	SD			0.0576773	0.0576773		5.65012	5.65012		1.54919	1.54919		1.01419	1.01419
3	Mean			1.67	#DIV/0!		60.8182	#DIV/0!		21.9091	#DIV/0!		10.0909	#DIV/0!
	SD			0.0679706	#DIV/0!		5.7414	#DIV/0!		2.54773	#DIV/0!		1.446	#DIV/0!
4	Mean			1.64133	#DIV/0!		57.9333	#DIV/0!		21.6	#DIV/0!		2.13333	#DIV/0!
	SD			0.0422352	#DIV/0!		5.95779	#DIV/0!		1.50238	#DIV/0!		0.63994	#DIV/0!
				Height										Weight
				개체-간 효과 검정										개체-간 효과 검정
				종속 변수:Height										종속 변수:Weight
				소스	제 III 유형 제곱합	자유도	평균 제곱	F	유의확률					소스	제 III 유형 제곱합	자유도	평균 제곱	F	유의확률
				수정 모형	0.187266	3	0.062422	19.9218	1.5789e-08					수정 모형	1316.9	3	438.965	12.971	2.49373e-06
				절편	149.163	1	149.163	47604.8	1.3644e-73					절편	208917	1	208917	6173.31	2.27662e-52
				Gender	0.173205	1	0.173205	55.2779	1.58909e-09					Gender	1156.47	1	1156.47	34.1727	4.30966e-07
				Level	0.00824337	1	0.00824337	2.63084	0.111357					Level	149.35	1	149.35	4.41317	0.0409398
				Gender * Level	0.000128497	1	0.000128497	0.0410092	0.840376					Gender * Level	3.77622	1	3.77622	0.111584	0.739803
				오차	0.150401	48	0.00313336							오차	1624.41	48	33.8419
				합계	152.767	52								합계	215166	52
				수정 합계	0.337667	51								수정 합계	2941.31	51

## Sheet: Boundary
			Group#
			Elite_male	1	Int_male	2	Elite_female	3	Int_female	4
				Approaching Speed			Contact time			Initial Shoe angle			Maximal lunge distance
				unit	m/s		unit	s		unit	deg		unit	m
			Group#	Right	Left		Right	Left		Right	Left		Right	Left
Elite_male	S_1		1	0.733453	1.6065		0.581333	0.573334		52.6579	50.3033		2.52	2.61
	S_2		1	0.873088	0.76026		0.668667	0.768667		47.496	44.135		2.64	2.85
	S_3		1	0.528032	0.652107		0.554667	0.594		45.1741	42.1768		2.38	2.62
	S_4		1	0.443283	0.867325		0.469333	0.49		39.9832	43.3457		2.66	2.83
	S_5		1	0.71768	0.926012		0.961333	1.02133		53.1044	51.6695		2.4	2.26
	S_6		1	0.585858	0.793062		0.68	0.636		49.2241	49.3443		2.38	2.65
	S_7		1	0.980849	0.775513		0.612	0.667333		49.8796	49.6904		2.34	2.73
	S_8		1	0.718202	0.372666		0.779333	0.804667		43.9718	42.4479		2.34	2.8
	S_9		1	0.555912	0.848522		0.656	0.699333		41.7667	40.4489		2.455	2.63
	S_10		1	0.748245	0.577708		0.776	0.778667		38.1163	35.3465		2.66	2.8
	S_11		1	0.559867	0.7968		0.734667	0.73		42.6179	41.5187		2.31	2.48
Int_male	S_1		2	0.976108	0.263513		0.793333	0.836		31.8754	32.632		2.35	2.4
	S_2		2	0.670772	0.43472		0.802666	0.822666		30.2009	24.0736		2.42	2.47
	S_3		2	0.909104	0.280086		0.716	0.806		35.9808	34.4103		2.46	2.55
	S_4		2	1.12914	0.715716		0.706	0.744		35.3764	33.599		2.6	2.52
	S_5		2	0.981997	0.610678		0.685333	0.676667		25.9279	20.7347		2.48	2.48
	S_6		2	1.73952	1.41705		0.672	0.817333		35.9929	28.903		2.53	2.49
	S_7		2	1.08684	0.915514		0.719333	0.707333		33.9334	28.8685		2.32	2.47
	S_8		2	1.0001	0.684721		0.688	0.796		34.1362	28.4788		2.52	2.77
	S_9		2	0.624356	0.409403		0.854667	0.776667		38.806	34.0996		2.38	2.45
	S_10		2	0.844893	0.80887		0.671333	0.992		37.5481	37.4074		2.65	2.92
	S_11		2	1.09744	0.46931		0.714	0.714666		28.3219	26.1307		2.59	2.56
	S_12		2	1.25848	0.732657		1.17867	0.938667		48.7742	42.5869		2.6	2.68
	S_13		2	1.4751	1.77859		0.623333	0.611334		36.7675	34.0537		2.31	2.44
	S_14		2	1.12382	0.724504		0.722667	0.801333		39.5588	39.9135		2.46	2.56
	S_15		2	1.43424	0.684948		0.708667	0.670667		35.2172	33.0211		2.41	2.42
Elite_female	S_1		3	1.85969	1.97343		0.584445	0.572223		52.5762	51.6911		1.84	1.95
	S_2		3	1.79611	1.88023		0.595556	0.58		50.8222	48.3515		1.94	2.2
	S_3		3	1.47874	1.5361		0.632222	0.691111		41.8561	44.2094		1.88	1.89
	S_4		3	1.61193	1.65762		0.655555	0.672222		43.5874	43.8742		1.87	1.94
	S_5		3	1.86186	1.99418		0.632222	0.636667		45.2972	46.1996		1.8	1.81
	S_6		3	1.64047	1.61867		0.626667	0.616667		46.7261	46.1276		1.79	1.88
	S_7		3	1.63683	1.64727		0.761111	0.776667		33.5845	36.802		1.98	1.98
	S_8		3	1.66881	1.89308		0.647778	0.612222		53.9338	58.3318		1.905	1.95
	S_9		3	1.42748	1.45427		0.787778	0.754444		38.3728	34.366		1.82	1.84
	S_10		3	1.92561	1.97126		0.611111	0.65		51.9351	54.2291		1.58	1.69
	S_11		3	1.7465	1.85658		0.67	0.686667		49.9028	52.514		1.8	1.855
Int_female	S_1		4	1.36535	1.53785		0.686667	0.786666		39.8432	29.6968		1.8	1.92
	S_2		4	1.48684	1.92056		0.61	0.763333		22.0245	24.6481		1.82	1.88
	S_3		4	1.78838	1.79827		0.568889	0.641111		39.4966	31.1204		1.64	1.81
	S_4		4	1.63535	1.65951		0.527777	0.528889		39.5554	38.7177		1.92	2.05
	S_5		4	1.20549	1.55103		0.747778	0.7		24.9029	21.8908		1.68	1.8
	S_6		4	1.66882	1.57596		0.614445	0.761111		39.7954	31.113		1.968	1.98
	S_7		4	1.50763	1.65794		0.66	0.65		40.668	35.4529		1.895	2.03
	S_8		4	1.45863	1.75062		0.646667	0.717778		38.1479	31.9145		1.845	1.96
	S_9		4	1.13244	1.35173		0.848889	0.78		30.178	28.5134		1.69	1.83
	S_10		4	1.70567	1.94738		0.757778	0.784444		43.228	43.9853		1.93	2.05
	S_11		4	1.4305	1.5452		0.832222	0.71		52.2644	45.7234		1.84	2
	S_12		4	1.52375	1.5057		0.654445	0.745556		29.9746	37.1268		1.66	1.83
	S_13		4	1.1432	1.30414		0.687778	0.678889		30.9985	28.9263		1.59	1.595
	S_14		4	1.58874	1.77264		0.671111	0.702222		29	26.7324		1.91	2.2
	S_15		4	1.77774	1.85628		0.852222	0.89		35.2232	36.1885		1.76	1.82
				Approaching Speed			Contact time			Initial Shoe angle			Maximal lunge distance
1	Mean			0.67677	0.816043		0.679394	0.705758		45.8175	44.5843		2.46227	2.66
	SD			0.159967	0.304387		0.132804	0.142195		5.04606	5.05538		0.135524	0.1751
2	Mean			1.09013	0.728685		0.7504	0.780756		35.2278	31.9275		2.472	2.54533
	SD			0.297358	0.406088		0.131878	0.0999228		5.32882	5.84492		0.108114	0.142872
3	Mean			1.69582	1.77115		0.65495	0.65899		46.2358	46.9724		1.83682	1.90773
	SD			0.159152	0.192852		0.064378	0.0657706		6.44688	7.19358		0.10484	0.126755
4	Mean			1.49457	1.64899		0.691111	0.722667		35.6867	32.7833		1.79653	1.917
	SD			0.212379	0.192673		0.0989985	0.0825357		7.8332	6.74072		0.120087	0.14533
	Right direction			Approaching Speed									Contact time									Initial Shoe angle									Maximal lunge distance
				개체-간 효과 검정									개체-간 효과 검정									개체-간 효과 검정									개체-간 효과 검정
				종속 변수:Ap_Speed									종속 변수:ContactTime									종속 변수:SoleAngle									종속 변수:Max_lunge_distance
				소스	제 III 유형 제곱합	자유도	평균 제곱	F	유의확률				소스	제 III 유형 제곱합	자유도	평균 제곱	F	유의확률				소스	제 III 유형 제곱합	자유도	평균 제곱	F	유의확률				소스	제 III 유형 제곱합	자유도	평균 제곱	F	유의확률
				수정 모형	7.10035	3	2.36678	47.506	2.09146e-14				수정 모형	0.0650707	3	0.0216902	1.73714	0.171936				수정 모형	1420.36	3	473.453	11.7881	6.61729e-06				수정 모형	5.56836	3	1.85612	134.589	2.27897e-23
				절편	78.0799	1	78.0799	1567.22	2.61572e-38				절편	24.4502	1	24.4502	1958.18	1.43561e-40				절편	84273.4	1	84273.4	2098.24	2.83961e-41				절편	233.01	1	233.01	16895.8	8.18846e-63
				Gender	6.45238	1	6.45238	129.512	3.10949e-15				Gender	0.0214938	1	0.0214938	1.7214	0.195753				Gender	2.44101	1	2.44101	0.0607765	0.806324				Gender	5.3635	1	5.3635	388.912	1.1577e-24
				Level	0.141878	1	0.141878	2.84777	0.0979897				Level	0.0361847	1	0.0361847	2.89798	0.0951597				Level	1417.82	1	1417.82	35.301	3.08002e-07				Level	0.0029841	1	0.0029841	0.21638	0.643916
				Gender * Level	1.19624	1	1.19624	24.0108	1.132e-05				Gender * Level	0.00389375	1	0.00389375	0.311845	0.579146				Gender * Level	0.00480378	1	0.00480378	0.000119605	0.99132				Gender * Level	0.00768466	1	0.00768466	0.557222	0.459023
				오차	2.3914	48	0.0498208						오차	0.599337	48	0.0124862						오차	1927.86	48	40.1638						오차	0.66197	48	0.013791
				합계	90.5169	52							합계	26.0046	52							합계	86254.1	52							합계	244.626	52
				수정 합계	9.49174	51							수정 합계	0.664408	51							수정 합계	3348.22	51							수정 합계	6.23033	51

## Sheet: GRF
			Group#
ShoeB？	Roundheel		Elite_male	1	Int_male	2	Elite_female	3	Int_female	4
ShoeC	Flattedheel
ShoeD	Standardheel			Peak impact force			Peak shear(A-P) force			Max loading rate			Mean loading rate			Vertical impulse
				unit	BW		unit	BW		unit	BW/s		unit	BW/s		unit	BW*s
			Group#	Right	Left		Right	Left		Right	Left		Right	Left		Right	Left
Elite_male	S_1		1	2.03162	2.0152		-1.22371	-1.30509		200.859	187.359		164.726	156.015		0.774252	0.767432
	S_2		1	2.39101	2.45553		-1.40875	-1.78708		284.585	279.673		229.536	226.665		0.836342	0.93459
	S_3		1	2.47528	2.71535		-1.23579	-1.53315		259.866	301.964		237.626	262.776		0.815866	0.848128
	S_4		1	2.31652	2.40258		-1.46411	-1.45883		268.295	309.363		220.621	228.817		0.805817	0.798796
	S_5		1	1.63945	1.55823		-1.11305	-1.52323		140.625	124.449		132.929	109.992		1.06516	1.06474
	S_6		1	2.13006	2.21759		-1.38994	-1.70109		209.749	231.977		182.576	198.59		1.18465	1.14786
	S_7		1	1.75453	1.81511		-1.36983	-1.53898		175.966	190.636		148.27	162.547		1.09987	1.12087
	S_8		1	2.22714	2.4678		-1.27265	-1.82379		208.668	258.745		189.544	219.36		1.13179	1.13315
	S_9		1	1.8011	2.04882		-1.78707	-1.754		182.949	214.91		164.986	190.588		0.959958	0.974671
	S_10		1	2.62266	2.37029		-2.12614	-2.48652		290.405	234.13		268.991	223.964		1.13901	1.13821
	S_11		1	1.91821	1.96703		-1.10623	-1.22172		189.921	188.298		166.801	168.602		1.09389	1.11287
Int_male	S_1		2	2.41679	2.31729		-1.90536	-2.22739		273.79	251.866		252.187	252.796		0.982822	0.934364
	S_2		2	3.00008	3.47128		-2.5677	-2.75603		154.674	153.537		108.437	126.612		1.06043	1.22296
	S_3		2	1.87817	1.7689		-1.44488	-1.68627		219.81	198.478		194.293	184.58		0.985884	1.04501
	S_4		2	2.49501	2.78347		-2.38192	-2.94331		268.649	171.029		117.412	95.4332		1.35362	1.29758
	S_5		2	2.30354	2.7458		-2.18989	-2.4925		187.49	199.411		108.402	128.209		1.06698	1.04991
	S_6		2	1.96527	2.48137		-2.46446	-2.73369		154.771	116.991		92.122	85.0756		1.07122	1.24472
	S_7		2	2.05654	2.74467		-2.43784	-3.14256		174.654	151.132		92.7763	94.1029		1.18566	1.12406
	S_8		2	2.31523	2.37795		-2.02339	-2.60292		231.149	205.301		229.609	92.9493		1.13089	1.22277
	S_9		2	1.95713	1.85424		-2.15183	-2.40648		171.597	146.436		180.658	95.0891		1.26705	1.23605
	S_10		2	2.77774	2.59858		-1.84376	-2.10939		289.153	292.292		268.814	257.71		1.31251	1.46164
	S_11		2	3.26668	3.09401		-2.95562	-2.82372		195.315	180.042		112	106.69		1.26317	1.25154
	S_12		2	2.19999	1.85794		-2.41021	-2.93738		263.105	212.133		221.848	190.558		1.29592	1.12744
	S_13		2	2.20797	2.319		-2.18585	-2.52009		215.982	234.531		218.972	226.244		1.17023	1.15739
	S_14		2	2.6949	2.80642		-1.57505	-1.8389		294.09	320.528		276.4	283.001		1.30706	1.30661
	S_15		2	2.16737	2.13389		-1.62376	-1.8414		202.218	199.048		197.034	204.853		1.18048	1.14844
Elite_female	S_1		3	1.8736	1.6966		-1.96536	-2.29414		98.3723	87.309		114.557	103.511		0.935712	0.917386
	S_2		3	1.73409	1.74755		-1.50407	-1.68722		112.642	105.421		95.4103	92.4271		0.957649	0.938908
	S_3		3	1.94021	1.95445		-1.19537	-1.29394		89.7682	88.0232		94.39	97.8154		0.8206	0.817386
	S_4		3	1.92715	2.03347		-1.93898	-1.91841		108.947	108.885		105.016	110.345		1.04019	1.02824
	S_5		3	2.2468	2.18735		-1.65284	-1.72255		125.406	118.347		119.783	116.283		0.976748	0.969449
	S_6		3	2.00417	2.1025		-1.1441	-1.24725		109.329	106.293		98.8834	104.78		1.0113	0.970979
	S_7		3	2.09157	2.2841		-1.48979	-1.67051		101.261	105.571		59.9879	65.9244		0.759275	0.804206
	S_8		3	1.86206	2.02472		-1.25019	-1.43335		100.79	122.281		93.231	111.147		0.94033	1.00394
	S_9		3	1.78619	1.91242		-1.06777	-1.27855		90.6747	102.109		90.4543	97.0595		1.22895	0.890403
	S_10		3	2.23222	2.28894		-1.21904	-1.42853		149.122	143.967		135.091	139.477		0.966854	0.955951
	S_11		3	1.63209	1.84951		-1.1823	-1.28065		109.364	122.768		94.135	116.522		0.805185	0.829293
Int_female	S_1		4	2.53451	3.02028		-1.69274	-2.158		117.306	122.23		37.0687	52.9485		0.745691	0.806473
	S_2		4	3.66651	3.72055		-2.91348	-3.18278		137.347	130.403		102.761	104.363		0.670076	0.652362
	S_3		4	2.76499	2.83498		-2.21943	-2.3601		139.432	129.721		41.9846	50.6409		0.887281	0.938598
	S_4		4	2.73126	2.78337		-2.39805	-2.37759		162.798	158.14		49.1257	52.3428		0.690624	0.738904
	S_5		4	2.04732	2.54095		-1.37284	-1.7744		120.217	155.893		42.3101	77.4522		0.666516	0.781856
	S_6		4	3.35153	3.61635		-2.50896	-2.75113		192.342	138.259		59.0602	79.7482		1.03383	1.02376
	S_7		4	3.08131	3.59007		-2.19748	-2.62346		141.51	141.847		43.279	60.1649		0.84081	0.921907
	S_8		4	2.49883	3.15287		-1.94373	-2.55047		104.932	122.079		43.3123	67.8735		0.741734	0.838029
	S_9		4	2.6152	3.07003		-1.64425	-2.16575		115.735	161.137		51.1371	70.8759		0.853302	0.954217
	S_10		4	2.89758	3.43045		-2.24794	-2.77813		153.59	151.467		41.58	51.1076		0.93325	1.02472
	S_11		4	2.38929	2.39105		-1.76133	-1.79388		123.631	102.597		28.4103	32.4248		0.934986	0.882648
	S_12		4	2.03529	2.26827		-1.27059	-1.63877		117.372	168.563		73.1083	27.1621		0.745691	0.806473
	S_13		4	1.84327	1.81191		-1.49295	-1.48932		79.1781	71.7833		34.483	36.376		0.670076	0.652362
	S_14		4	3.45562	3.48495		-2.62564	-2.79222		112.353	112.847		63.2452	72.7256		0.887281	0.938598
	S_15		4	2.43488	2.57153		-2.18869	-2.36342		93.9399	93.6274		36.992	41.461		0.690624	0.738904
				Peak impact force			Peak shear(A-P) force			Max loading rate			Mean loading rate			Vertical impulse
1	Mean			2.11887	2.18487		-1.40884	-1.6485		219.263	229.228		191.51	195.265		0.991509	1.00376
	SD			0.318943	0.337895		0.30403	0.338104		49.1533	55.9115		42.2376	43.2434		0.156202	0.14582
2	Mean			2.38016	2.49032		-2.1441	-2.4708		219.763	202.184		178.064	161.593		1.1756	1.1887
	SD			0.402418	0.476464		0.414336	0.446616		48.1316	55.1483		66.9119	70.1982		0.122326	0.127348
3	Mean			1.9391	2.00742		-1.41907	-1.56865		108.698	110.089		100.085	105.027		0.949346	0.920559
	SD			0.194453	0.199776		0.31769	0.328723		16.8443	16.2877		19.1984	18.2127		0.128511	0.0764864
4	Mean			2.68983	2.95251		-2.03187	-2.31996		127.445	130.706		49.8572	58.5111		0.799452	0.846653
	SD			0.531936	0.563717		0.483729	0.485047		28.2586	27.3358		18.7168	20.6798		0.118077	0.120928
	Right direction			Peak impact force									Peak shear(A-P) force									Max loading rate									Mean loading rate									Vertical impulse
				개체-간 효과 검정									개체-간 효과 검정									개체-간 효과 검정									개체-간 효과 검정									개체-간 효과 검정
				종속 변수:Impact_force									종속 변수:AP_force									종속 변수:Max_LR									종속 변수:Mean_LR									종속 변수:Vertical_Impulse
				소스	제 III 유형 제곱합	자유도	평균 제곱	F	유의확률				소스	제 III 유형 제곱합	자유도	평균 제곱	F	유의확률				소스	제 III 유형 제곱합	자유도	평균 제곱	F	유의확률				소스	제 III 유형 제곱합	자유도	평균 제곱	F	유의확률				소스	제 III 유형 제곱합	자유도	평균 제곱	F	유의확률
				수정 모형	4.15871	3	1.38624	8.71608	0.000101265				수정 모형	5.85431	3	1.95144	12.2358	4.553e-06				수정 모형	132349	3	44116.2	29.9939	4.51924e-11				수정 모형	182087	3	60695.7	32.6939	1.16529e-11				수정 모형	1.07666	3	0.358887	21.4446	5.91716e-09
				절편	264.456	1	264.456	1662.79	6.57768e-39				절편	155.637	1	155.637	975.868	1.48935e-33				절편	1.44643e+06	1	1.44643e+06	983.405	1.24873e-33				절편	856369	1	856369	461.285	2.89988e-26				절편	48.7105	1	48.7105	2910.6	1.27701e-44
				Gender	0.0512519	1	0.0512519	0.32225	0.572904				Gender	0.0334456	1	0.0334456	0.209709	0.649062				Gender	130627	1	130627	88.8108	1.70298e-12				Gender	153039	1	153039	82.435	5.42137e-12				Gender	0.553288	1	0.553288	33.0606	6.03017e-07
				Level	3.26723	1	3.26723	20.543	3.88134e-05				Level	5.75855	1	5.75855	36.107	2.42998e-07				Level	1174.16	1	1174.16	0.79829	0.376063				Level	12861.4	1	12861.4	6.92782	0.0113798				Level	0.00337347	1	0.00337347	0.201575	0.655473
				Gender * Level	0.758467	1	0.758467	4.76893	0.033897				Gender * Level	0.0477456	1	0.0477456	0.299372	0.586811				Gender * Level	1054.55	1	1054.55	0.716972	0.401341				Gender * Level	4293.71	1	4293.71	2.31282	0.134872				Gender * Level	0.357711	1	0.357711	21.3743	2.87069e-05
				오차	7.63409	48	0.159044						오차	7.65532	48	0.159486						오차	70600.4	48	1470.84						오차	89111.3	48	1856.48						오차	0.803308	48	0.0167356
				합계	292.003	52							합계	182.494	52							합계	1.69746e+06	52							합계	1.11556e+06	52							합계	51.8992	52
				수정 합계	11.7928	51							수정 합계	13.5096	51							수정 합계	202949	51							수정 합계	271198	51							수정 합계	1.87997	51

## Sheet: Knee joint
			Group#
			Elite_male	1	Int_male	2	Elite_female	3	Int_female	4
				Peak knee flexion moment			Peak knee extension moment
				unit	BW/kg		unit	BW/kg
			Group#	Right	Left		Right	Left
Elite_male	S_1		1	-1.13738	-1.04312		0.829136	1.06398
	S_2		1	-0.991278	-0.466854		2.04816	2.19522
	S_3		1	-1.2438	-1.00611		1.02349	1.08939
	S_4		1	-1.16205	-0.922507		1.00197	0.965609
	S_5		1	-0.780407	-0.813393		1.36304	1.10214
	S_6		1	-1.03078	-0.989633		1.02549	0.869175
	S_7		1	-0.920678	-0.604381		1.4666	1.49647
	S_8		1	-0.843839	-0.487441		2.07137	2.16861
	S_9		1	-0.890391	-1.02903		0.880293	0.781336
	S_10		1	-1.66945	-1.256		0.124755	0.551295
	S_11		1	-1.01139	-1.06448		1.26694	1.68994
Int_male	S_1		2	-1.14765	-0.646967		1.07656	1.04917
	S_2		2	-0.522877	-0.779399		1.00154	0.977581
	S_3		2	-0.480117	-0.883315		0.363471	0.555463
	S_4		2	-1.56976	-0.737912		0.241592	0.440916
	S_5		2	-0.597705	-0.07368		0.577768	0.740274
	S_6		2	-0.513325	-0.347189		0.927538	1.12689
	S_7		2	-0.446629	-0.401251		0.538712	0.593652
	S_8		2	-0.508883	-0.192459		0.554827	0.778736
	S_9		2	-0.84754	-0.446828		0.483188	0.546427
	S_10		2	-0.513744	-0.494464		1.10995	1.33332
	S_11		2	-0.234754	-0.0543529		1.01608	1.12426
	S_12		2	-0.944807	-0.67018		0.487003	0.393882
	S_13		2	-0.57918	-0.406908		0.301393	0.456561
	S_14		2	-1.23114	-0.949113		0.787938	0.863603
	S_15		2	-0.620552	-0.769931		0.877651	1.04303
Elite_female	S_1		3	0.382839	0.977938		0.0827772	0.324797
	S_2		3	0.753484	-0.328561		0.66097	1.03186
	S_3		3	-0.546925	-0.309182		0.587707	0.992
	S_4		3	-0.13894	-0.953915		0.921615	0.96261
	S_5		3	-0.22505	-0.183051		1.48356	0.228779
	S_6		3	-0.772416	-0.545843		0.821833	0.961759
	S_7		3	0.366578	-0.143268		1.60981	1.20082
	S_8		3	-0.605756	0.610031		0.897556	0.832205
	S_9		3	0.0755389	-0.0520419		0.629091	0.967158
	S_10		3	0.0591251	0.502635		0.404096	1.20899
	S_11		3	-0.162667	0.658085		0.886364	0.914549
Int_female	S_1		4	0.610756	-0.278655		1.07428	1.02824
	S_2		4	-0.533971	0.228141		0.878458	1.02961
	S_3		4	-0.0304945	0.608022		0.762354	0.602285
	S_4		4	0.412016	-0.553125		1.09658	1.29501
	S_5		4	-0.80439	0.587256		0.882101	0.919257
	S_6		4	0.990578	-0.418986		1.31498	1.36337
	S_7		4	-0.343156	0.837835		0.35409	0.426659
	S_8		4	-0.329842	0.595762		0.925467	1.07363
	S_9		4	0.123362	-0.19451		1.06542	1.1251
	S_10		4	0.874683	1.06808		1.05933	0.99913
	S_11		4	0.654268	0.485849		1.4956	2.01489
	S_12		4	0.0118437	0.0148879		0.499801	0.874531
	S_13		4	-0.24014	-0.149689		0.642597	0.751558
	S_14		4	0.664272	-0.154725		0.633474	1.09349
	S_15		4	0.236697	0.318062		0.603357	0.591508
				Peak knee flexion moment			Peak knee extension moment
1	Mean			-1.06195	-0.880268		1.19102	1.27029
	SD			0.245476	0.256739		0.554675	0.548001
2	Mean			-0.717245	-0.523596		0.689681	0.801585
	SD			0.359964	0.282581		0.296027	0.297087
3	Mean			-0.0740172	0.0211661		0.816853	0.875048
	SD			0.464406	0.589701		0.437827	0.316767
4	Mean			0.153099	0.199614		0.885859	1.01255
	SD			0.540868	0.488977		0.310479	0.379468
	Right direction			Peak knee flexion moment									Peak knee extension moment
				개체-간 효과 검정									개체-간 효과 검정
				종속 변수:Knee_flexion_moment									종속 변수:Knee_ext_moment
				소스	제 III 유형 제곱합	자유도	평균 제곱	F	유의확률				소스	제 III 유형 제곱합	자유도	평균 제곱	F	유의확률
				수정 모형	12.0553	3	4.01843	22.3143	3.43709e-09				수정 모형	1.64973	3	0.549911	3.4686	0.0231836
				절편	9.16431	1	9.16431	50.8893	4.5885e-09				절편	40.7267	1	40.7267	256.886	6.68571e-21
				Gender	10.9268	1	10.9268	60.6767	4.58675e-10				Gender	0.10191	1	0.10191	0.642801	0.42665
				Level	1.0362	1	1.0362	5.75401	0.0203846				Level	0.592006	1	0.592006	3.73411	0.0592249
				Gender * Level	0.0434588	1	0.0434588	0.241326	0.625489				Gender * Level	1.03049	1	1.03049	6.4999	0.0140376
				오차	8.64399	48	0.180083						오차	7.60992	48	0.15854
				합계	29.1397	52							합계	49.4405	52
				수정 합계	20.6993	51							수정 합계	9.25965	51

## Sheet: Interaction
Peak impact					Knee extension moment
2.19	0.34				1.27	0.55
2.01	0.2				0.87	0.32
2.49	0.48				0.8	0.3
2.95	0.56				1.01	0.38
	Skilled	Unskilled		SD
Male	1.27	0.8		0.34	0.3
Female	0.87	1.01		0.2	0.38
